# Supplementary material for: Novel Self-Transmissible and Broad-Host-Range Plasmids Exogenously Captured From Anaerobic Granules or Cow Manure
Source: Front Microbiol. 2018 Nov 6;9:2602. doi: 10.3389/fmicb.2018.02602 (PMC6232296; doi:10.3389/fmicb.2018.02602)
Supplement: Supplementary file 1 [file Table_1.xlsx]

## Sheet: Table_S1
Table S1. Primers used in this study
Name	aSequence (5 '-3')	Note	bReference
trfA-F	TTCACSTTCTACGAGMTKTGCCAGGAC	For detection of IncP-1αβε plasmids	Bahl et al., 2005
trfA-R	GWCAGCTTGCGGTACTTCTCCCA
trfA_γ-F	TTCACTTTTTACGAGCTTTGCAGCGAC	For detection of IncP-1γ plasmids	Bahl et al., 2005
trfA_γ-R	GTCAGCTCGCGGTACTTCTCCCA
trfA_δ-F	TTCACGTTCTACGAGCTTTGCACAGAC	For detection of IncP-1δ plasmids	Bahl et al., 2005
trfA_δ-R	GACAGCTCGCGGTACTTTTCCCA
W_FW	CCTAAGAACAACAAAGCCCCCG	For detection of IncW plasmids	Carattoli, 2005
W_RW	GGTGCGCGGCATAGAACCGT
A/C_F	GAGAACCAAAGACAAAGACCTGGA	For detection of IncA and IncC plasmids	Carattoli, 2005
A/C_R	ACGACAAACCTGAATTGCCTCCTT
repA-1	TACGGCACCCTGCCCCGGCTGCTGCTGAC	For detection of PromA plasmids	Zhang et al., 2015
repA-2	CGCTTCGATAGGTAGCTCATGCG
repAd-1	TATGCACGGAAGCAGTCAAG	For detection of PromAδ plasmids	This study
repAd-2	AACTCATGCGATGGGTTAGC
repA_29-F	GCCAATCAGTGACATTGTGG	For detection of pSN1216-29 plasmids	This study
repA_29-R	TCACTTCCCGGTAAATCCAG
29_Tc_resistance_Fwd	tctgtccttcTTTGCGCATTCACAGTTC	For construction pSN1216-29ori001	This study
29_Tc_resistance_Rev	tatcgagcggTTCTCATGTTTGACAGCTTATC
29_repA_oriV_Fwd	aacatgagaaCCGCTCGATAGAGCGTTTTTTTTTAG
29_repA_oriV_Rev	aatgcgcaaaGAAGGACAGACGCATGAAATTAC
29_Tc_noAT_Rev	tccagaccctTTCTCATGTTTGACAGCTTATC	For construction pSN1216-29ori002	This study
29_noAT_Fwd	aacatgagaaAGGGTCTGGAAATCGTCATTTTTC
29_Tc_2iteron_Rev	cattacccacTTCTCATGTTTGACAGCTTATC	For construction pSN1216-29ori003	This study
29_2iteron_Fwd	aacatgagaaGTGGGTAATGGACGGAAC
29_Tc_nooriV_Rev	cggtgtgtaaTTCTCATGTTTGACAGCTTATC	For construction pSN1216-29ori004	This study
29_nooriV_Fwd	aacatgagaaTTACACACCGGGCGCATTC
29_nooriV_Rev	aatgcgcaaaGAAGGACAGACGCATGAAATTACTTG
aNucleotides specific for the target genes are in uppercase and those for overlapping ends during HiFi DNA assembly system.
bReferences are listed in main text.
