# Supplementary material for: Novel Self-Transmissible and Broad-Host-Range Plasmids Exogenously Captured From Anaerobic Granules or Cow Manure
Source: Front Microbiol. 2018 Nov 6;9:2602. doi: 10.3389/fmicb.2018.02602 (PMC6232296; doi:10.3389/fmicb.2018.02602)
Supplement: Supplementary file 2 [file Table_2.XLSX]

## Sheet: Table_S2
Table S2. Detailed information of plasmid DNA sequences and analyses in the present study.
Plasmid name	Size (bp)	Library preparation kit	Raw read length (bp)	Total numbers of raw reads	Total bases of raw reads (bp)	Total numbers of high-quality reads	Total bases of high-quality reads (bp)	Coverage	Trimmomatic version	khmer version	khmer coverage	SPAdes version	SPAdes option
pSN1104-34	41117	Nano	301	939788	281495160	707374	182860107	4447.31	0.33	2	5	3.9.0	"--only-assembler --careful --cov-cutoff auto"
pSN1104-59	50476	PCR-Free	301	958074	286876219	673208	170900802	3385.78	0.33	2	5	3.9.0	"--only-assembler --careful --cov-cutoff auto"
pSN1104-11	41033	Nano	301	711298	212650410	518334	123327228	3005.56	0.33	2	4	3.9.1	"--only-assembler"
pSN1216-29	35552	PCR-Free	301	725056	216574320	557968	142767742	4015.74	0.33	2	4	3.9.1	"--only-assembler --careful"
pSN0729-62	38644	Nano	251	572920	143125087	507954	124849926	3230.77	0.36	NA	NA	3.11.1	"--only-assembler --careful --cov-cutoff auto"
pSN0729-70	39117	Nano	251	497650	124530967	430678	105740188	2703.18	0.36	NA	NA	3.11.1	"--only-assembler --careful --cov-cutoff auto"
