# Supplementary material for: Novel Self-Transmissible and Broad-Host-Range Plasmids Exogenously Captured From Anaerobic Granules or Cow Manure
Source: Front Microbiol. 2018 Nov 6;9:2602. doi: 10.3389/fmicb.2018.02602 (PMC6232296; doi:10.3389/fmicb.2018.02602)
Supplement: Supplementary file 3 [file Table_3.XLSX]

## Sheet: Table_S3
Table S3. Captured plasmids in this study.
Sample	Sampling date	Number of isolates	Group							Plasmid-positive
			IncP-1			IncA and IncC	IncW	PromA	PCR-negative
			αβε	δ	γ
granule	150911	6	0	0	0	0	0	1(1)	5	1
	151104	67	3(1)	0	0	0	0	54(52)	12	54
	151207	35	0	0	0	0	0	26(26)	9	13
	160517	10	1(0)	1(0)	0	0	0	4(4)	5	6
cow manure	161216	43	0	0	0	0	0	0	43	1
	161218	25	0	0	0	0	0	0	25	0
	170729	86	0	0	0	0	0	5(5)	81	50
total		272	4(1)	1(0)	0	0	0	90(88)	180	125
aDigits in parenthesis indicate the number of plasmid showing only one positive signal with primer sets using in the present study.
