# Supplementary material for: Novel Self-Transmissible and Broad-Host-Range Plasmids Exogenously Captured From Anaerobic Granules or Cow Manure
Source: Front Microbiol. 2018 Nov 6;9:2602. doi: 10.3389/fmicb.2018.02602 (PMC6232296; doi:10.3389/fmicb.2018.02602)
Supplement: Supplementary file 4 [file Table_4.XLSX]

## Sheet: Table_S4-1
Table S4-1. CDSs on pSN1104-59
Gene	Positions	Direction	Protein length (aa)	Proein size (KDa)	Functional group	Putative function	Top hit	identity (%)	Accession no.
trfA	1..1221	+	406	45.7	Replication	TrfA (replication initiation protein)	TrfA protein	89	AAA17040.1
kluB	2395..2709	-	104	11.6	maintenance	Type II toxin of toxin-antitoxin system	type II toxin-antitoxin system RelE/ParE family toxin	100	WP_074052977.1
kluA	2706..2975	-	89	9.8	maintenance	Antirestriction protein KlcA	Antirestriction protein KlcA	100	WP_001095942.1
klcA	3144..3572	+	142	15.7	maintenance	KlcA protein	KlcA protein	99	CDG15363.1
klcB	3624..4832	+	402	42.7	maintenance	KlcB protein	KlcB	83	T08485
korC	4849..5106	+	85	9.4	maintenance	KorC protein	KorC	90	T08484
kleA	5264..5500	+	68	8.6	maintenance	Hypothetical protein	hypothetical protein	65	WP_031943998.1
kleB	5559..5774	+	71	7.7	maintenance	Hypothetical protein	hypothetical protein	65	WP_031943997.1
kleE	5919..6248	+	1.9	12	maintenance	KleE protein	KleE protein	83	T08481
kleF	6250..6780	+	176	18.7	maintenance	KleF	KleF	92	T08480
korA	6894..7196	+	100	10.9	maintenance	Hypothetical protein	Hypothetical protein	80	WP_031943994.1
incC	7193..7957	+	254	27.7	maintenance	IncC protein	IncC protein	87	WP_031943995.1
korB	7954..9003	+	349	38.2	maintenance	Chromosome partitioning protein ParB	Chromosome partitioning protein ParB	99	WP_001274868.1
krfA	9184..10,215	+	343	36.8	maintenance	Hypothetical protein	Hypothetical protein	69	WP_031943992.1
kfrB	10,387..10,734	+	115	12.5	maintenance	Hypothetical protein	Hypothetical protein	79	WP_031943985.1
kfrC	10,763..11,416	+	217	24	maintenance	Hypothetical protein	Hypothetical protein	68	WP_031943984.1
traM	11,619..12,059	-	156	15.6	Transfer	TraM protein	Transfer protein	73	WP_031943983.1
traL	12,059..12,784	-	241	26.4	Transfer	TraL protein	Transfer protein	91	WP_031943982.1
traK	12,784..13,182	-	132	14.7	Transfer	TraK protein	Transfer protein	61	WP_031943981.1
traJ	13,556..13,930	+	124	14.2	Transfer	TraJ protein	TraJ	87	T08534
traI	13,965..16,205	+	746	82.1	Transfer	DNA relaxase	DNA relaxase	67	WP_031943979.1
traG	16,202..18,115	+	637	69.9	Transfer	DNA transporter	DNA transporter	85	WP_031943977.1
traF	18,112..18,648	+	178	18.8	Transfer	Signal peptidase TraF	Conjugative transfer signal peptidase TraF	79	WP_031943976.1
traE	18,661..20,724	+	687	74.9	Transfer	DNA topoisomerase	DNA topoisomerase III	82	WP_031943975.1
traD	20,746..21,135	+	129	13.6	Transfer	TraD protein	TraD protein	63	WP_031943974.1
traC	21,139..25,485	+	1448	158.8	Transfer	Hypothetical protein	DUF1738 domain-containing protein	83	WP_031944021.1
parA	25,974..26,825	+	283	25.4	maintenance	Resolvase	Resolvase	99	WP_011296189.1
upf31.0	26,827..27,501	-	224	25.4	Unknown	Hypothetical protein	SAM-dependent methyltransferase	99	WP_074052972.1
upf30.5	27,656..27,973	-	105	11.3	Unknown	Hypothetical protein	Outer membrane protein	70	WP_031943958.1
orf30	28,106..29,065	-	319	34.4	Unknown	Cation transporter	Cation transporter	100	WP_023294863.1
orf31	29,085..29,651	-	188	20.7	Unknown	Recombinase	Recombinase family protein	100	WP_011638900.1
orf32	30,102..30,659	-	185	20.4	Unknown	Recombinase	Recombinase family protein	100	WP_003100847.1
orf33	30,653..31,024	-	123	14.1	Unknown	Hypothetical protein	Hypothetical protein	100	WP_003100853.1
orf34	31,021..31,521	-	166	18.9	Unknown	Hypothetical protein	Hypothetical protein	100	WP_003100856.1
orf35	31,518..31,844	-	108	12.5	Unknown	Hypothetical protein	Hypothetical protein	100	WP_003100858.1
orf36	32,445..32,846	-	133	15.3	Unknown	Hypothetical protein	DUF86 domain-containing protein	100	WP_001293886.1
orf37	32,843..33,133	-	96	10.3	Unknown	Hypothetical protein	Nucleotidyltransferase from Gammaproteobacteria	100	WP_006812575.1
tnpA	33,292..36,261	+	989	111.3	transposase	Transposase	Tn3-like element TnShfr1 family transposase	100	WP_024945956.1
orf39	36,258..36,356	-	32	2.5	Unknown	Hypothetical protein	OmpA family protein	71	WP_010890142.1
trbP	36,372..37,103	-	243	26.6	Transfer	TrbP protein	TrbP	99	AEV56657.1
trbO	37,084..37,350	-	88	9.7	Transfer	TrbO protein	UpfA protein	100	CDG15390.1
trbN	37,347..37,988	-	213	23.1	Transfer	TrbN protein	conjugal transfer protein TrbN	100	WP_001115727.1
trbM	38,002..38,586	-	194	21.4	Transfer	TrbM protein	TrbM	99	AEV56654.1
trbL	38,604..40,340	-	578	56.5	Transfer	TrbL protein	P-type conjugative transfer protein TrbL	66	WP_031943954.1
trbK	40,351..40,578	-	75	8	Transfer	TrbK protein	Entry exclusion lipoprotein TrbK	100	WP_011798701.1
trbJ	40,588..41,352	-	254	27.5	Transfer	TrbJ protein	P-type conjugative transfer protein TrbJ	66	WP_000802794.1
trbI	41,370..42,791	-	473	49.4	Transfer	TrbI protein	TrbI	72	WP_031943951.1
trbH	42,796..43,287	-	163	17.1	Transfer	TrbH protein	TrbH	61	WP_031943950.1
trbG	43,290..44,189	-	299	32.6	Transfer	TrbG protein	P-type conjugative transfer protein TrbG	100	WP_000753228.1
trbF	44,207..44,989	-	260	28.7	Transfer	TrbF protein	TrbF	74	WP_031943948.1
trbE	44,986..47,544	-	852	94	Transfer	TrbE protein	VirB4 family type IV secretion/conjugal transfer ATPase	87	WP_031943947.1
trbD	47,541..47,852	-	103	11.8	Transfer	TrbD protein	TrbD	95	WP_031943946.1
trbC	47,856..48,320	-	154	16.3	Transfer	TrbC protein	Prepilin	89	WP_031943945.1
trbB	48,337..49,299	-	320	35	Transfer	TrbB protein	TrbB	84	AAA26405.1
trbA	49,612..49,974	-	120	13.4	Transfer	TrbA protein	Transcriptional regulator	98	WP_010890126.1
ssb	50,088..50,429	+	113	12.7	maintenance	Single-stranded DNA-binding protein	Ssb	99	AAA17041.1

## Sheet: Table_S4-2
Table S4-2. CDSs on pSN1104-11
Gene	Positions	Direction	Protein length (aa)	Proein size (KDa)	Functional group	Putative function	Top hit	identity (%)	Accession no.
repA	79..1212	+	377	41.6	Replication	RepA (replication initation protein)	RepA (plasmid)	77	ACT97177.1
orf2	1209..1688	+	159	17.7	Unknown	ParB protein	micrococcal nuclease	97	WP_099597091.1
							ParB (plasmid)	68	ACT97240.1
orf3	1698..1913	+	71	8	Unknown	Lipoprotein	lipoprotein	35	WP_044497646.1
radC	2208..2729	+	173	18.7	Maintenance	DNA repair protein RadC	DNA repair protein RadC	64	WP_087080897.1
kleA	3737..4054	+	105	11.8	Maintenance	Hypothetical protein	hypothetical protein	57	WP_031943998.1
ardC	4115..4921	+	268	30	Maintenance	ArdC protein	ArdC (plasmid)	75	ACT97239.1
orf7	5008..5190	+	60	6	Unknown	Hypothetical protein	hypothetical protein	100	WP_070697978.1
orf8	5194..5589	+	131	14.6	Unknown	Hypothetical protein	hypothetical protein	100	WP_070697979.1
orf9	5614..5907	+	97	10.3	Unknown	Hypothetical protein	MOL98_64 (plasmid)	53	ACT97237.1
kfrA	6008..6979	+	323	35.6	Maintenance	KfrA protein	KfrA (plasmid)	65	ACT97236.1
orf11	7162..8064	+	300	33.4	primase	Primase	primase	45	WP_010895878.1
ssb	8796..9152	+	118	13.2	Maintenance	Single-stranded DNA-binding protein	Ssb (plasmid)	80	ACT97235.1
korA	9153..9542	+	129	14.5	Maintenance	KorA protein	KorA (plasmid)	69	ACT97234.1
incC/parA	9549..10,343	+	264	28.6	Maintenance	IncC protein	IncC (plasmid)	74	ACT97233.1
korB/parB	10,343..11,497	+	384	41	Maintenance	KorB protein	KorB (plasmid)	54	ACT97232.1
orf16	11,494..12,036	+	180	19.5	Unknown	Hypothetical protein	MOL98_58 (plasmid)	57	ACT97231.1
orf17	12,273..12,872	+	199	22.7	Unknown	Hypothetical protein	MOL98_57 (plasmid)	41	ACT97230.1
traS/rlx	12,859..13,944	+	361	40.1	Transfer	Relaxase	TraS (plasmid)	64	ACT97229.1
orf19	14,027..14,368	+	113	13.4	Maintenance	Addiction module antidote protein	addiction module antidote protein	99	WP_070697989.1
orf20	14,365..14,676	+	103	13.4	Maintenance	Hypothetical protein	hypothetical protein	100	WP_099597086.1
orf21	14,782..15,186	-	134	15	Unknown	Hypothetical protein	hypothetical protein	99	WP_099597086.1
orf22	15,192..15,431	-	79	8.7	Unknown	Hypothetical protein	MOL98_18 (plasmid)	70	ACT97193.1
traR/mpfL	15,431..16,009	-	197	21.2	Transfer	TrbM/MpfL protein	TrbM protein	60	WP_031943955.1
traQ	16,023..16,583	-	186	19.9	Transfer	TraQ protein	TraQ (plasmid)	58	ACT97225.1
orf25	17,032..17,397	-	121	13.8	Unknown	Hypothetical protein	hypothetical protein	75	WP_038211603.1
orf26	17,474..17,692	-	72	7.6	Unknown	Hypothetical protein	hypothetical protein	94	WP_070697993.1
traO/pri	17,714..19,111	-	465	52.1	Transfer	TraO protein (DNA primase)	TraO (plasmid)	60	ACT97222.1
orf28	19,123..19,842	-	239	26.2	Maintenance	Hypothetical protein	hypothetical protein MOL98_48 (plasmid)	58	ACT97241.1
traN/cpl	19,953..22,547	-	864	94.6	Transfer	TraN protein (type IV coupling protein)	TraN (plasmid)	68	ACT97221.1
traM/tivB11	22,769..23,839	-	356	39.8	Transfer	P-type DNA transfer ATPase VirB11	P-type DNA transfer ATPase VirB11	99	WP_070697997.1
traL/tivB10	23,817..24,953	-	378	39.2	Transfer	type IV secretion system protein VirB10	type IV secretion system protein VirB10	99	WP_070697998.1
traK/tivB9	24,950..25,828	-	292	31.7	Transfer	P-type conjugative transfer protein VirB9	P-type conjugative transfer protein VirB9	100	WP_046532891.1
traJ/tivB8	25,825..26,556	-	243	27.2	Transfer	TraJ/VirB8 protein	TraJ (plasmid)	70	ACT97216.1
traI/tivB7	26,559..26,723	-	54	5.7	Transfer	TraI/VirB7 protein	TraI protein (plasmid)	71	CAC79174.1
traH/tivB6	26,869..27,954	-	361	37.8	Transfer	TraH/VirB6 protein	hypothetical protein	100	WP_070698000.1
traG/eex	27,966..28,274	-	102	10.7	Transfer	Entry exclusion protein	hypothetical protein	100	WP_070698001.1
							entry exclusion protein	41	WP_015042068.1
traF/tivB5	28,388..29,107	-	239	26.1	Transfer	TraF/VirB5 protein	TraF (plasmid)	73	ACT97211.1
traE/tivB4	29,112..31,646	-	844	95.6	Transfer	VirB4 family type IV secretion/conjugal transfer ATPase	VirB4 family type IV secretion/conjugal transfer ATPase	99	WP_070698003.1
traD/tivB3	31,656..31,979	-	107	12.1	Transfer	TraD/VirB3 protein	hypothetical protein	100	WP_046534567.1
traC/tivB2	31,995..32,300	-	101	10.6	Transfer	TraC/VirB2 protein	hypothetical protein	100	WP_070698005.1
traB/topA	32,466..34,823	-	785	87	Transfer	TraB protein (topoisoperase)	TraB (plasmid)	72	ACT97207.1
traA/slt	34,835..35,599	-	254	26.7	Transfer	Lytic transglycosylase	lytic transglycosylase	100	WP_081340478.1
orf43	35,651..36,022	-	123	14.2	Unknown	Hypothetical protein	MOL98_31 (plasmid)	72	ACT97205.1
orf44	36,979..37,407	+	142	16.1	Unknown	Hypothetical protein	hypothetical protein	97	WP_081340470.1
orf45	37,436..37,639	+	67	7.6	Unknown	Hypothetical protein	hypothetical protein	99	WP_070697960.1
orf46	37,663..38,070	+	135	15	Unknown	Hypothetical protein	hypothetical protein	99	WP_070697961.1
orf47	38,128..38,655	+	175	19.5	Unknown	Hypothetical protein	hypothetical protein	99	WP_070697962.1
orf48	38,831..39,055	+	74	8.1	Unknown	Hypothetical protein	hypothetical protein	99	WP_070697963.1
orf49	39,066..39,269	+	67	7.5	Unknown	Hypothetical protein	hypothetical protein	100	WP_046532840.1
orf50	39,266..39,697	+	143	15.8	Unknown	Hypothetical protein	theronine dehydrogenase	68	OJZ05858.1
orf51	39,694..39,831	+	45	5.1	Unknown	Hypothetical protein	hypothetical 5.2 kDa protein (plasmid)	73	CAD38661.1
orf52	39,850..40,116	+	88	9.4	Unknown	Hypothetical protein	hypothetical protein	100	WP_070697965.1
orf53	40,127..40,402	+	91	10	Unknown	Hypothetical protein	hypothetical protein	100	WP_070697966.1
orf54	40,419..40,634	+	71	7.4	Unknown	Hypothetical protein	hypothetical protein	100	WP_046532838.1

## Sheet: Table_S4-3
Table S4-3. CDSs on pSN1104-34
Gene	Positions	Direction	Protein length (aa)	Proein size (KDa)	Functional group	Putative function	Top hit	identity (%)	Accession no.
repA	79..1212	+	377	41.6	Replication	RepA (replication initation protein)	RepA (plasmid)	77	ACT97177.1
orf2	1209..1688	+	159	17.7	Unknown	ParB protein	micrococcal nuclease	97	WP_099597091.1
							ParB (plasmid)	68	ACT97240.1
orf3	1698..1913	+	71	8	Unknown	Lipoprotein	lipoprotein	35	WP_044497646.1
radC	2208..2729	+	173	18.7	Replication/maintenance	DNA repair protein RadC	DNA repair protein RadC	64	WP_087080897.1
kleA	3737..4054	+	105	11.8	Maintenance	Hypothetical protein	hypothetical protein	57	WP_031943998.1
ardC	4115..4921	+	268	30	Maintenance	ArdC protein	ArdC (plasmid)	75	ACT97239.1
orf7	5008..5190	+	60	6	Unknown	Hypothetical protein	hypothetical protein	100	WP_070697978.1
orf8	5194..5589	+	131	14.6	Unknown	Hypothetical protein	hypothetical protein	100	WP_070697979.1
orf9	5614..5907	+	97	10.3	Unknown	Hypothetical protein	MOL98_64 (plasmid)	53	ACT97237.1
kfrA	6008..6979	+	323	35.6	Maintenance	KfrA protein	KfrA (plasmid)	65	ACT97236.1
orf11	7162..8148	+	300	33.4	primase	Primase	primase	45	WP_010895878.1
ssb	8880..9236	+	118	13.2	Maintenance	Single-stranded DNA-binding protein	Ssb (plasmid)	80	ACT97235.1
korA	9237..9626	+	129	14.5	Maintenance	KorA protein	KorA (plasmid)	69	ACT97234.1
incC/parA	9633..10,427	+	264	28.6	Maintenance	IncC protein	IncC (plasmid)	74	ACT97233.1
korB/parB	10,427..11,581	+	384	41	Maintenance	KorB protein	KorB (plasmid)	54	ACT97232.1
orf16	11,578..12,120	+	180	19.5	Unknown	Hypothetical protein	MOL98_58 (plasmid)	57	ACT97231.1
orf17	12,357..12,956	+	199	22.7	Transfer	Hypothetical protein	MOL98_57 (plasmid)	41	ACT97230.1
traS/rlx	12,943..14,028	+	361	40.1	Transfer	Relaxase	TraS (plasmid)	64	ACT97229.1
orf19	14,111..14,452	+	113	13.4	Unknown	Addiction module antidote protein	addiction module antidote protein	99	WP_070697989.1
orf20	14,449..14,760	+	103	13.4	Unknown	Hypothetical protein	hypothetical protein	100	WP_099597086.1
orf21	14,866..15,270	+	134	15	Unknown	Hypothetical protein	hypothetical protein	99	WP_099597086.1
orf22	15,276..15,515	+	79	8.7	Unknown	Hypothetical protein	MOL98_18 (plasmid)	70	ACT97193.1
traR/mpfL	15,515..16,093	+	197	21.2	Transfer	TrbM/MpfL protein	TrbM protein	60	WP_031943955.1
traQ	16,107..16,667	+	186	19.9	Transfer	TraQ protein	TraQ (plasmid)	58	ACT97225.1
orf25	17,116..17,481	+	121	13.8	Unknown	Hypothetical protein	hypothetical protein	75	WP_038211603.1
orf26	17,558..17,776	+	72	7.6	Unknown	Hypothetical protein	hypothetical protein	94	WP_070697993.1
traO/pri	17,798..19,195	+	465	52.1	Transfer	TraO protein (DNA primase)	TraO (plasmid)	60	ACT97222.1
orf28	19,207..19,926	+	239	26.2	DNA replication	Hypothetical protein	hypothetical protein MOL98_48 (plasmid)	58	ACT97241.1
traN/cpl	20,037..22,631	+	864	94.6	Transfer	TraN protein (type IV coupling protein)	TraN (plasmid)	68	ACT97221.1
traM/tivB11	22,853..23,923	+	356	39.8	Transfer	P-type DNA transfer ATPase VirB11	P-type DNA transfer ATPase VirB11	99	WP_070697997.1
traL/tivB10	23,901..25,037	+	378	39.2	Transfer	type IV secretion system protein VirB10	type IV secretion system protein VirB10	99	WP_070697998.1
traK/tivB9	25,034..25,912	+	292	31.7	Transfer	P-type conjugative transfer protein VirB9	P-type conjugative transfer protein VirB9	100	WP_046532891.1
traJ/tivB8	25,909..26,640	+	243	27.2	Transfer	TraJ/VirB8 protein	TraJ (plasmid)	70	ACT97216.1
traI/tivB7	26,643..26,807	+	54	5.7	Transfer	TraI/VirB7 protein	TraI protein (plasmid)	71	CAC79174.1
traH/tivB6	26,953..28,038	+	361	37.8	Transfer	TraH/VirB6 protein	hypothetical protein	100	WP_070698000.1
traG/eex	28,050..28,358	+	102	10.7	Transfer	Entry exclusion protein	TraG (plasmid)	70	ACT97212.1
							entry exclusion protein	41	WP_015042068.1
traF/tivB5	28,472..29,191	+	239	26.1	Transfer	TraF/VirB5 protein	TraF (plasmid)	73	ACT97211.1
traE/tivB4	29,196..31,730	+	844	95.6	Transfer	VirB4 family type IV secretion/conjugal transfer ATPase	VirB4 family type IV secretion/conjugal transfer ATPase	99	WP_070698003.1
traD/tivB3	31,740..32,063	+	107	12.1	Transfer	TraD/VirB3 protein	hypothetical protein	100	WP_046534567.1
traC/tivB2	32,079..32,384	+	101	10.6	Transfer	TraC/VirB2 protein	hypothetical protein	100	WP_070698005.1
traB/topA	32,550..34,907	+	785	87	Transfer	TraB protein (topoisoperase)	TraB (plasmid)	72	ACT97207.1
traA/slt	34,919..35,683	+	254	26.7	Transfer	Lytic transglycosylase	lytic transglycosylase	100	WP_081340478.1
orf43	35,735..36,106	+	123	14.2	Unknown	Hypothetical protein	MOL98_31 (plasmid)	72	ACT97205.1
orf44	37,063..37,491	+	142	16.1	Unknown	Hypothetical protein	hypothetical protein	97	WP_081340470.1
orf45	37,520..37,723	+	67	7.6	Unknown	Hypothetical protein	hypothetical protein	99	WP_070697960.1
orf46	37,747..38,154	+	135	15	Unknown	Hypothetical protein	hypothetical protein	99	WP_070697961.1
orf47	38,212..38,739	+	175	19.5	Unknown	Hypothetical protein	hypothetical protein	99	WP_070697962.1
orf48	38,915..39,139	+	74	8.1	Unknown	Hypothetical protein	hypothetical protein	99	WP_070697963.1
orf49	39,150..39,353	+	67	7.5	Unknown	Hypothetical protein	hypothetical protein	100	WP_046532840.1
orf50	39,350..39,781	+	143	15.8	Unknown	Hypothetical protein	theronine dehydrogenase	68	OJZ05858.1
orf51	39,778..39,915	+	45	5.1	Unknown	Hypothetical protein	hypothetical 5.2 kDa protein (plasmid)	73	CAD38661.1
orf52	39,934..40,200	+	88	9.4	Unknown	Hypothetical protein	hypothetical protein	100	WP_070697965.1
orf53	40,211..40,486	+	91	10	Unknown	Hypothetical protein	hypothetical protein	100	WP_070697966.1
orf54	40,503..40,718	+	71	7.4	Unknown	Hypothetical protein	hypothetical protein	100	WP_046532838.1

## Sheet: Table_S4-4
Table S4-4. CDSs on pSN0729-62
Gene	Positions	Direction	Protein length (aa)	Proein size (KDa)	Functional group	Putative function	Top hit	identity (%)	Accession no.
repA	1..1269	+	422	46.9	Replication	RepA (replication initation protein)	plasmid encoded RepA protein	74.6	WP_081340469.1
orf2	1437..1661	+	74	8	Unknown	Hypothetical protein	hypothetical protein	48.1	WP_068637941.1
orf3	1627..1878	+	83	9.8	Unknown	Hypothetical protein	predicted protein	38	XP_012179868.1
radC	2210..2731	+	173	18.8	Maintenance	DNA repair protein RadC	DNA repair protein RadC	62.7	WP_033475433.1
kleA	3526..3849	+	107	11.7	Maintenance	Hypothetical protein	hypothetical protein	67.6	WP_039816544.1
ardC	3908..4717	+	269	30.3	Maintenance	ArdC protein	DUF3560 domain-containing protein	78.7	WP_070697977.1
orf7	4733..4981	+	82	8.4	Unknown	Hypothetical protein	hypothetical protein	61.7	WP_012274929.1
orf8	4985..5377	+	130	14.7	Unknown	Hypothetical protein	hypothetical protein	64.3	WP_071446563.1
orf9	5487..6527	+	346	38.2	Maintenance	Hypothetical protein	hypothetical protein	46.5	WP_080308586.1
orf10	6634..7686	+	350	38.3	Unknown	Hypothetical protein	hypothetical protein	76.9	WP_070697981.1
ssb	8404..8766	+	120	13.4	Maintenance	Single-stranded DNA-binding protein	single-stranded DNA-binding protein	85.8	WP_070697982.1
korA	8767..9156	+	129	14.7	Maintenance	Hypothetical protein	hypothetical protein	79.1	WP_081340476.1
incC/parA	9163..9957	+	264	28.9	Maintenance	ParA faprotein	ParA family protein	83.3	WP_070697983.1
korB/parB	9958..11,022	+	354	38.7	Maintenance	ParB protein	chromosome partitioning protein ParB	69	WP_070697984.1
orf15	11,124..11,564	+	146	15.9	Unknown	Hypothetical protein	DUF192 domain-containing protein	68.8	WP_099597082.1
orf16	11,796..12,386	+	196	22.6	Unknown	Hypothetical protein	hypothetical protein 22.9 kDa (plasmid)	79.7	CAC79160.1
orf17	12,383..12,643	+	86	9.4	Unknown	Hypothetical protein	hypothetical protein	50.7	WP_042987894.1
traS/rlx	12,636..13,706	+	356	39.6	Transfer	Relaxase	hypothetical protein	69.7	WP_099597084.1
orf19	13,809..14,288	-	159	18	Unknown	Hypothetical protein	MOL98_55 (plasmid)	73.6	ACT97228.1
traR/mpfL	14,351..14,923	-	190	21.1	Transfer	TrbM/MpfL protein	conjugal transfer protein TrbM	69.6	WP_070697991.1
traQ	14,933..15,346	-	137	15	Transfer	TraQ protein	OmpA family protein	62.2	WP_080193813.1
orf22	15,378..15,554	+	58	6.5	Unknown	Hypothetical protein	Hypothetical protein, conserved	64.5	EEH13431.1
traO/pri	16,011..17,900	-	629	71.6	Transfer	TraO protein (DNA primase)	TraO protein (plasmid)	56.2	CAC82762.1
orf24	17,912..18,613	-	233	25.8	unknown	Hypothetical protein	hypothetical protein	71.9	WP_070697995.1
traN/cpl	18,723..21,239	-	838	92	Transfer	TraN protein (type IV coupling protein)	hypothetical protein	74.5	WP_070697996.1
traM/tivB11	21,458..22,507	-	349	39.2	Transfer	P-type DNA transfer ATPase VirB11	P-type DNA transfer ATPase VirB11	85.1	WP_031759549.1
traL/tivB10	22,524..23,678	-	384	40	Transfer	type IV secretion system protein VirB10	type IV secretion system protein VirB10	58.4	WP_052118644.1
traK/tivB9	23,678..24,556	-	292	32.2	Transfer	P-type conjugative transfer protein VirB9	P-type conjugative transfer protein VirB9	78.1	WP_046532891.1
traJ/tivB8	24,553..25,278	-	241	26.9	Transfer	TraJ/VirB8 protein	conjugal transfer protein TraJ	68.9	WP_070697999.1
traI/tivB7	25,297..25,734	-	145	15.7	Transfer	TraI/VirB7 protein	hypothetical protein M622_18150	46.3	EPZ14632.1
traH/tivB6	25,878..26,954	-	358	38.3	Transfer	TraH/VirB6 protein	conjugal transfer protein TraH	61.9	WP_087448426.1
traG/eex	26,967..27,209	-	80	8.8	Transfer	Entry exclusion protein	hypothetical protein	67.1	WP_087448427.1
							entry exclusion protein	41	WP_015042068.1
traF/tivB5	27,219..27,932	-	237	26.4	Transfer	TraF/VirB5 protein	P-type DNA transfer protein VirB5	68.3	WP_042420104.1
traE/tivB4	27,993..30,515	-	840	95.3	Transfer	VirB4 family type IV secretion/conjugal transfer ATPase	VirB4 family type IV secretion/conjugal transfer ATPase	83.2	WP_070698003.1
traD/tivB3	30,525..30,842	-	105	11.9	Transfer	TraD/VirB3 protein	hypothetical protein	77.6	WP_043298203.1
traC/tivB2	30,856..31,170	-	104	10.9	Transfer	TraC/VirB2 protein	hypothetical protein	74.1	WP_023127876.1
traB/topA	31,331..33,646	-	771	85.7	Transfer	TraB protein (topoisoperase)	type I DNA topoisomerase	82.6	WP_070698006.1
traA/slt	33,658..34,401	-	247	26.5	Transfer	Lytic transglycosylase	lytic transglycosylase	68	WP_081340478.1
orf39	34,454..34,855	-	133	15.3	Unknown	Hypothetical protein	hypothetical protein	77.2	WP_081340480.1
orf40	35,873..36,133	+	86	9.7	Unknown	Hypothetical protein	hypothetical protein	67.4	WP_011630670.1
orf41	36,155..36,379	+	74	8.7	Unknown	Hypothetical protein	hypothetical protein	79.1	WP_070697960.1
orf42	36,390..36,806	+	138	15.5	Unknown	Hypothetical protein	hypothetical protein	83.7	WP_070697961.1
orf43	36,869..37,417	+	182	20.3	Unknown	Hypothetical protein	hypothetical protein	67.4	WP_070697962.1
orf44	37,765..38,034	+	89	9.8	Unknown	Hypothetical protein	hypothetical protein	74.2	WP_070697965.1
orf45	38,044..38,319	+	91	10.1	Unknown	Hypothetical protein	hypothetical protein	75	WP_070697966.1
orf46	38,334..38,552	+	72	7.8	Unknown	Hypothetical protein	hypothetical protein	76.8	WP_046532838.1

## Sheet: Table_S4-5
Table S4-5. CDSs on pSN0729-70
Gene	Positions	Direction	Protein length (aa)	Proein size (KDa)	Functional group	Putative function	Top hit	identity (%)	Accession no.
repA	1..1269	+	422	46.9	Replication	RepA (replication initation protein)	plasmid encoded RepA protein	74.6	WP_081340469.1
orf2	1529..1786	+	85	10	unknown	Hypothetical protein	predicted protein	38	XP_012179868.1
radC	2118..2639	+	173	18.8	maintenance	DNA repair protein RadC	DNA repair protein RadC	62.7	WP_033475433.1
kleA	3432..3755	+	107	11.7	maintenance	Hypothetical protein	hypothetical protein	70.3	WP_039816544.1
ardC	3812..4621	+	269	30.3	maintenance	ArdC protein	DUF3560 domain-containing protein	78.4	WP_070697977.1
orf6	4637..4885	+	82	8.4	unknown	Hypothetical protein	hypothetical protein	61.7	WP_012274929.1
orf7	4889..5281	+	130	14.7	unknown	Hypothetical protein	hypothetical protein	65.1	WP_071446563.1
orf8	5391..6431	+	346	38.3	maintenance	Hypothetical protein	hypothetical protein	47.1	WP_080308586.1
orf9	6538..7590	+	350	38.3	unknown	Hypothetical protein	hypothetical protein	76.9	WP_070697981.1
ssb	8308..8670	+	120	13.4	maintenance	Single-stranded DNA-binding protein	single-stranded DNA-binding protein	85.8	WP_070697982.1
korA	8671..9060	+	129	14.7	maintenance	Hypothetical protein	hypothetical protein	79.1	WP_081340476.1
incC/parA	9067..9861	+	264	28.9	maintenance	ParA faprotein	ParA family protein	83.3	WP_070697983.1
korB/parB	9862..10,944	+	360	39.4	maintenance	ParB protein	chromosome partitioning protein ParB	69	WP_099597081.1
orf14	11,046..11,486	+	146	15.9	unknown	Hypothetical protein	DUF192 domain-containing protein	69.5	WP_099597082.1
orf15	11,718..12,308	+	196	22.6	unknown	Hypothetical protein	hypothetical protein 22.9 kDa (plasmid)	78.1	CAC79160.1
orf16	12,308..13,153	+	281	30.9	unknown	Hypothetical protein	3'-5' exonuclease	51.6	WP_042988631.1
traS/rlx	13,156..14,226	+	356	39.5	Transfer	Relaxase	hypothetical protein	70.2	WP_070697987.1
orf18	14,329..14,808	-	159	18	unknown	Hypothetical protein	MOL98_55 (plasmid)	73.6	ACT97228.1
traR/mpfL	14,871..15,443	-	190	21.1	Transfer	TrbM/MpfL protein	conjugal transfer protein TrbM	70.2	WP_070697991.1
traQ	15,453..15,866	-	137	15	Transfer	TraQ protein	OmpA family protein	62.2	WP_080193813.1
orf21	15,898..16,074	+	58	6.5	unknown	Hypothetical protein	Hypothetical protein, conserved	64.5	EEH13431.1
traO/pri	16,531..18,420	-	631	71.5	Transfer	TraO protein (DNA primase)	TraO protein (plasmid)	56.2	CAC82762.1
orf23	18,432..19,133	-	233	25.7	unknown	Hypothetical protein	hypothetical protein	72.3	WP_070697995.1
traN/cpl	19,243..21,756	-	837	91.9	Transfer	TraN protein (type IV coupling protein)	hypothetical protein	74.9	WP_070697996.1
traM/tivB11	21,975..23,024	-	349	39.2	Transfer	P-type DNA transfer ATPase VirB11	P-type DNA transfer ATPase VirB11	85.1	WP_031759549.1
traL/tivB10	23,041..24,195	-	384	40	Transfer	type IV secretion system protein VirB10	type IV secretion system protein VirB10	58.7	WP_052118644.1
traK/tivB9	24,195..25,073	-	292	32.2	Transfer	P-type conjugative transfer protein VirB9	P-type conjugative transfer protein VirB9	78.1	WP_046532891.1
traJ/tivB8	25,070..25,795	-	241	26.9	Transfer	TraJ/VirB8 protein	conjugal transfer protein TraJ	68.9	WP_070697999.1
traI/tivB7	25,815..26,252	-	145	15.6	Transfer	TraI/VirB7 protein	hypothetical protein M622_18150	42.3	EPZ14632.1
traH/tivB6	26,396..27,472	-	358	38.3	Transfer	TraH/VirB6 protein	conjugal transfer protein TraH	61.9	WP_087448426.1
traG/eex	27,485..27,727	-	80	8.8	Transfer	Entry exclusion protein	hypothetical protein	67.1	WP_087448427.1
							entry exclusion protein	41	WP_015042068.1
traF/tivB5	27,737..28,450	-	237	26.4	Transfer	TraF/VirB5 protein	P-type DNA transfer protein VirB5	68.3	WP_042420104.1
traE/tivB4	28,511..31,033	-	840	95.3	Transfer	VirB4 family type IV secretion/conjugal transfer ATPase	VirB4 family type IV secretion/conjugal transfer ATPase	83	WP_070698003.1
traD/tivB3	31,043..31,360	-	105	11.9	Transfer	TraD/VirB3 protein	hypothetical protein	77.6	WP_043298203.1
traC/tivB2	31,374..31,688	-	104	10.9	Transfer	TraC/VirB2 protein	type IV secretion system protein VirB2	66	WP_070698005.1
traB/topA	31,849..34,164	-	771	85.7	Transfer	TraB protein (topoisoperase)	type I DNA topoisomerase	82.6	WP_070698006.1
traA/slt	34,176..34,919	-	247	26.4	Transfer	Lytic transglycosylase	lytic transglycosylase	67.5	WP_081340478.1
orf38	34,975..35,373	-	132	15.2	unknown	Hypothetical protein	hypothetical protein	63.1	WP_081340480.1
orf39	36,346..36,606	+	86	9.7	unknown	Hypothetical protein	hypothetical protein	66.3	WP_011630670.1
orf40	36,628..36,852	+	74	8.7	unknown	Hypothetical protein	hypothetical protein	79.1	WP_070697960.1
orf41	36,872..37,279	+	135	15.2	unknown	Hypothetical protein	hypothetical protein	83.7	WP_070697961.1
orf42	37,342..37,890	+	182	20.3	unknown	Hypothetical protein	hypothetical protein	67.4	WP_070697962.1
orf43	38,238..38,507	+	89	9.8	unknown	Hypothetical protein	hypothetical protein	74.2	WP_070697965.1
orf44	38,517..38,792	+	91	10.1	unknown	Hypothetical protein	hypothetical protein	75	WP_070697966.1
orf45	38,807..39,025	+	72	7.8	unknown	Hypothetical protein	hypothetical protein	76.8	WP_046532838.1

## Sheet: Table_S4-6
Table S4-6. CDSs on pSN1216-29
Gene	Positions	Direction	Protein length (aa)	Proein size (KDa)	Functional group	Putative function	Top hit	identity (%)	Accession no.
repA	1..1242	+	413	46.2	Replication	RepA (replication initiation protein)	pVS1 replication protein	52	AAD19680.1
orf2	1739..2182	-	147	16.3	Unknown	Hypothetical protein	hypothetical protein	99	WP_032734707.1
orf3	2618..2944	+	108	12.8	Maintenance	Toxin	type II toxin-antitoxin system RelE/ParE family toxin	100	WP_004167231.1
orf4	2948..3259	+	103	11.3	Maintenance	Antitoxin	hypothetical protein	100	WP_004167230.1
							addiction module antidote protein	99	WP_083144594.1
orf5	3396..3764	-	122	13.2	Unknown	Hypothetical protein	hypothetical protein	100	WP_061456091.1
orf6	3790..4149	-	119	13.8	Unknown	Hypothetical protein	hypothetical protein	99	WP_083144599.1
orf7	4197..4652	-	151	15.9	Unknown	Hypothetical protein	hypothetical protein	100	WP_021155439.1
traL	4664..5419	-	251	27.6	Transfer	TraL protein	transfer origin protein TraL	100	WP_021155400.1
traK	5436..5819	-	127	13.6	Transfer	TraK protein	hypothetical protein	100	WP_004167204.1
							putative DNA processing protein TraK	83	AGH89390.1
traJ	6217..6585	+	122	13.4	Transfer	TraJ protein	CopG family transcriptional regulator	100	WP_004167202.1
							conjugal transfer protein TraJ	99	WP_052907166.1
rlx	6582..9278	+	898	100.5	Transfer	DNA relaxase	conjugal transfer protein TraI	100	WP_061456093.1
cpl	9275..11,233	+	652	72.1	Transfer	Type IV coupling protein	conjugal transfer protein TrbG	100	WP_004167199.1
pep	11,230..11,796	+	188	19.4	Transfer	Peptidase	conjugal transfer protein TraF	100	WP_034077587.1
slt	11,793..12,689	+	298	31.5	Transfer	Lytic transglycosylase	lytic transglycosylase catalytic	100	WP_021155405.1
pri	12,692..16,009	+	1105	119.9	Transfer	DNA primase	DUF1738 domain-containing protein	99	WP_063131971.1
topA	16,067..18,082	+	671	73	Maintenance	DNA topoisomerase	type I DNA topoisomerase	100	WP_063131972.1
fiwA	18,148..18,855	+	235	25.4	Transfer	Fertility inhibition factor FiwA	hypothetical protein	100	WP_063131973.1
							fertility inhibition factor FiwA	98	WP_070584962.1
orf18	18,917..19,642	-	241	26.6	Unknown	Hypothetical protein	zinc metalloprotease	99	WP_063131975.1
orf19	19,629..19,859	-	76	8.2	Maintenance	Addiction module antidote protein	hypothetical protein	100	WP_063131976.1
							HigA family addiction module antidote protein	44	ESN47274.1
parB	19,856..20,521	-	221	242.2	Maintenance	ParB protein	ORF3	61	AAA26416.1
orf21	20,705..21,043	+	112	12.5	Unknown	Hypothetical protein	hypothetical protein	100	WP_004167187.1
orf22	21,099..21,506	+	135	14.2	Unknown	Hypothetical protein	hypothetical protein	100	WP_032734740.1
qteE	21,523..22,137	+	204	23.4	Unknown	Hypothetical protein	hypothetical protein	99	WP_061456105.1
inv	22,193..22,822	+	209	22.8	invertase	Invertase	recombinase family protein	98	WP_065421379.1
orf25	22,996..23,244	+	82	9	Unknown	Hypothetical protein	hypothetical protein	99	WP_004167172.1
orf26	23,473..23,943	-	156	16.5	Transfer	TraP protein	hypothetical protein	100	WP_032734748.1
							TraP	44	ACT97224.1
tivB10	23,995..25,458	-	487	51.4	Transfer	VirB10 protein	conjugal transfer protein TrbI	100	WP_048956643.1
tivB7	25,455..25,913	-	152	15.7	Transfer	VirB7 protein	conjugal transfer protein TrbH	100	WP_032734695.1
tivB9	25,915..26,853	-	312	33.9	Transfer	VirB9 protein	P-type conjugative transfer protein TrbG	46	WP_031944008.1
tivB7	26,853..27,551	-	232	25.9	Transfer	VirB7 protein	conjugal transfer protein	100	WP_004167166.1
orf31	27,641..27,946	-	101	11.8	Unknown	Hypothetical protein	hypothetical protein	100	WP_034047586.1
tivB8	27,950..29,668	-	572	55.5	Transfer	VirB8 protein	P-type conjugative transfer protein TrbL	99	WP_032734699.1
orf33	29,672..29,875	-	67	6.8	Unknown	Hypothetical protein	hypothetical protein	100	WP_004167247.1
tivB5	29,876..30,664	-	262	28.7	Transfer	VirB5 protein	P-type conjugative transfer protein TrbJ	100	KCV25153.1
tivB4	30,633..33,140	-	835	93.5	Transfer	VirB4 protein	hypothetical protein	100	WP_021155427.1
tivB3	33,154..33,468	-	104	12	Transfer	VirB3 protein	conjugal transfer protein TrbD	100	EJK10923.1
tivB2	33,468..33,959	-	163	16.6	Transfer	VirB2 protein	conjugal transfer protein TrbC	99	WP_021155429.1
tivB11	33,971..34,954	-	327	35.2	Transfer	VirB11 protein	P-type conjugative transfer ATPase TrbB	100	WP_052168460.1
trbA	35,135..35,395	-	86	9.6	Transfer	TrbA protein	XRE family transcriptional regulator	100	WP_004167234.1
