# Supplementary material for: Novel Self-Transmissible and Broad-Host-Range Plasmids Exogenously Captured From Anaerobic Granules or Cow Manure
Source: Front Microbiol. 2018 Nov 6;9:2602. doi: 10.3389/fmicb.2018.02602 (PMC6232296; doi:10.3389/fmicb.2018.02602)
Supplement: Supplementary file 5 [file Table_5.XLSX]

## Sheet: Table_S5
Table S5. Lists of similar plasmids with PromA plasmids and/or pSN1216-29.
Name	Inc group	size (bp)	GC (%)	Host	Accession number	Accessory	Source	Reference
PromA plasmids
pSN0729-62	PromAδ	38644	54.19	unknown (triparental plasmid capture approach)	AP018705	not identified	Cow manure, Miyazaki, Japan	This study
pSN0729-70	PromAδ	39117	54.302	unknown (triparental plasmid capture approach)	AP018706	not identified	Cow manure, Miyazaki, Japan	Tthis study
pSN1104-11	PromAγ	41033	63.693	unknown (triparental plasmid capture approach)	AP018707	not identified	Granule (UASB plant)	Tthis study
pSN1104-34	PromAγ	41117	63.711	unknown (triparental plasmid capture approach)	AP018708	not identified	Granule (UASB plant)	Tthis study
pTer331	PromAβ	40457	60.595	Collimonas fungivorans Ter331	NC_010332	not identified	A dune soil on Wadden Island Terschelling, The Netherlands	Mela et al. 2008
pIPO2T	PromAβ	45319	58.902	unknown (triparental plasmid capture approach)	AJ297913	not identified	Wheat rhizosphere in Wageningen, The Netherlands	Tauch et al. 2002
pSFA231	PromAβ	41518	60.54	unknown (triparental plasmid capture approach)	KJ850907	not identified	Petroleum-contaminated sediment Shen-fu wastewater irrigation zone, China	Li et al., 2015
pXl1	PromAβ	42402	60.686	Thiomonas intermedia ATCC 15466	NZ_CP020047	not identified	A facultative autotroph sulfide-oxidizing bacteria in mud	NZ_CP020047
pMOL98	PromAβ	55563	59.932	unknown (triparental plasmid capture approach)	FJ666348	transposon Tn6048 (transposed from recipient chromosome)	Hydrocarbon-polluted soil in Essen, Germany, a derivative plasmid of pES1	Top et al., 1994; Gstalder et al. 2003; van der Auwera et al., 2009
pSB102	PromAα	55578	59.847	unknown (biparental plasmid capture approach)	AJ304453	Mercury resistance genes (Tn5178)	Alfalfa rhizospere in Braunschweig, Germany	Schneiker et al. 2001;
plasmid_2	PromAα	47098	61.935	Burkholderia pseudomallei TSV202	NZ_CP009154	DNA cytosine methyltransferase	Environmental sample, one of three plasmids	Johnson et al., 2015
pMRAD02	PromAα	47003	62.479	Methylobacterium radiotolerans JCM 2831	NC_010509	an adhesin/hemagglutinin, its cognate serine protease	Unpolished rice in Japan	Ito and Iizuka 1971 GenBank Accession no. NC_010509
pSN1216-29-like plasmids
pSN1216-29	unidentified	35552	61.76	unknown (triparental plasmid capture approach)	AP018710	not identified	Cow manure, Miyazaki, Japan	This study
pEC743_4	unidentified	37000	61.7	Escherichia coli Ecol_743	NZ_CP015073	not identified	Collected from human in United Arab Emirates, Dubai, by Merck Study for Monitoring of Antimicrobial Resistance Trends (SMART)	GenBank Accession no. CP015073
pKPN-704	unidentified	36707	61.57	Klebsiella pneumoniae ST258, and Klebsiella pneumoniae ST37	CP014764	not identified	Clinical isolate (from a patient with blaKPC-positive Klebsiella pneumoniae in Canada)	Conlan et al., 2016
pJHX613	unidentified	36454	61.33	Pseudomonas aerugionsa E6130952	NZ_CP020602	not identified	Clinical isolate (from a patient with respiratory failure in Canada)	Xiong et al., 2017
pMBUI2	unidentified	37976	59.36	Unknown	KC170285	not identified	Pond in Moscow, Idaho, USA	Brown et al., 2013
pSRC119-A/C	IncC (multi-replicon)	174068	52.41	Salmonella enterica serovar Senftenberg SRC119	KM670336	antibiotic resistance genes, including aphA1b, tetR(D), tetA(D), erm(42), aacC4, hph, aadA2	Pigs in Australia	Harmer et al., 2015
