# Supplementary material for: Novel Self-Transmissible and Broad-Host-Range Plasmids Exogenously Captured From Anaerobic Granules or Cow Manure
Source: Front Microbiol. 2018 Nov 6;9:2602. doi: 10.3389/fmicb.2018.02602 (PMC6232296; doi:10.3389/fmicb.2018.02602)
Supplement: Supplementary file 6 [file Table_6.XLSX]

## Sheet: Table_S6
Table S6. Pairwise distances of each product of core genes in PromA plasmids between pSN1104-11 and the others.
	pSN1104-34	pSN0729-62	pSN0729-70	plasmid_2	pTer331	pXI1	pMOL98	pSFA231	pSB102	pIPO2T	pMRAD02
RepA	0	0.21	0.21	0.353	0.364	0.372	0.372	0.373	0.374	0.379	0.495
ArdC	1e-06	0.228903	0.232815	0.280546	0.312891	0.291771	0.299667	0.299299	0.313563	0.304782	0.459542
Ssb	0	0.137	0.137	0.22	0.206	0.213	0.204	0.204	0.228	0.213	0.469
KorA	0	0.19	0.19	0.387	0.393	0.405	0.38	0.38	0.392	0.556	0.737
IncC/ParA	0	0.177	0.177	0.134	0.306	0.295	0.3	0.3	0.184	0.306	0.395
KorB/ParB	0	0.294	0.294	0.52	0.655	0.652	0.662	0.648	0.362	0.659	0.51
TraS/Rlx	0	0.36	0.354	0.304	0.522	0.514	0.505	0.503	0.329	0.512	0.82
TraR/MpfL	0	0.34	0.333	0.659	0.411	0.406	0.406	0.406	0.719	0.452	0.685
TraQ	0	0.357	0.353	0.528	0.535	0.557	0.539	0.559	0.462	0.555	0.943
TraO/Pri	0	0.39	0.391	0.486	0.572	0.566	0.568	0.559	0.522	0.567	1.049
TraN/Cpl	0	0.253	0.251	0.27	0.318	0.366	0.366	0.364	0.297	0.366	0.606
TraM/TivB11	0	0.316	0.316	0.285	0.238	0.235	0.235	0.238	0.271	0.241	0.378
TraL/TivB10	0	0.491	0.487	0.366	0.35	0.341	0.341	0.346	0.403	0.351	0.496
TraK/TivB9	0	0.292	0.292	0.349	0.369	0.357	0.357	0.357	0.434	0.359	0.389
TraJ/TivB8	0	0.421	0.421	0.324	0.362	0.364	0.362	0.362	0.381	0.372	0.531
TraH/TivB6	0	0.997	0.997	0.182	0.174	0.183	0.183	0.183	0.222	0.187	1.033
TraI/TivB7*	0	0.724	0.724	0.3	0.428	0.423	0.423	0.423	0.471	0.456	0.765
TraG/Eex	0	0.748	0.756	0.296	0.305	0.272	0.272	0.272	0.36	0.32	0.987
TraF/TivB5	0	0.514	0.521	0.508	0.322	0.307	0.307	0.322	0.445	0.332	0.498
TraE/TivB4	0	0.172	0.174	0.238	0.248	0.245	0.245	0.244	0.237	0.247	0.375
TraD/TivB3	0	0.275	0.275	0.226	0.277	0.277	0.277	0.277	0.25	0.278	0.622
TraC/TivB2	0	0.463	0.459	0.317	0.335	0.335	0.335	0.335	0.306	0.338	1.051
TraB/TopA	0	0.198	0.198	0.33	0.401	0.363	0.363	0.367	0.384	0.467	0.561
TraA/Slt	0	0.36	0.358	0.431	0.533	0.536	0.536	0.537	0.455	0.546	0.638
*TraI of pXl1 was manually annotated by authors because it was not in the database.
