# Supplementary material for: Novel Self-Transmissible and Broad-Host-Range Plasmids Exogenously Captured From Anaerobic Granules or Cow Manure
Source: Front Microbiol. 2018 Nov 6;9:2602. doi: 10.3389/fmicb.2018.02602 (PMC6232296; doi:10.3389/fmicb.2018.02602)
Supplement: Supplementary file 7 [file Table_7.XLSX]

## Sheet: Table_S5
Table S7. GC content of core genes in PromA plasmids.
Gene	pSN1104-11	pSN1104-34	pSN0729-62	pSN0729-70	plasmid_2	pTer331	pXI1	pMOL98	pSFA231	pSB102	pIPO2T	pMRAD02
repA	66	66	57	57	64	62	63	61	61	61	61	63
ardC	65	65	56	57	61	61	62	61	61	60	61	61
ssb	60	60	54	54	60	60	59	60	60	55	59	59
korA	62	62	53	52	59	56	55	56	55	58	55	58
incC/parA	62	62	52	52	58	56	56	57	57	54	57	60
korB/parB	65	65	55	54	64	63	63	62	64	58	62	63
traS/rlx	67	67	56	56	64	62	63	62	63	60	62	67
traR/mpfL	64	64	54	54	62	62	63	62	62	58	61	64
traQ	66	66	55	55	65	61	57	60	59	61	60	68
traO/pri	63	63	53	53	63	61	61	60	61	59	60	65
traN/cpl	63	63	52	52	61	59	59	59	59	60	59	62
traM/tivB11	63	63	54	54	61	59	59	59	59	57	59	62
traL/tivB10	66	66	56	56	64	62	63	63	63	62	62	65
traK/tivB9	64	64	50	50	62	60	61	61	60	59	60	62
traJ/tivB8	61	61	53	53	62	59	60	60	60	58	59	63
traH/tivB6	63	63	53	53	62	60	60	60	60	61	60	62
traI/tivB7*	64	64	57	57	58	57	58	58	58	58	57	64
traG/eex	64	64	49	49	61	61	60	61	61	63	60	64
traF/tivB5	61	61	55	54	60	58	59	59	58	60	58	61
traE/tivB4	61	61	50	50	59	57	57	57	56	57	56	59
traD/tivB3	59	59	54	54	60	58	59	59	58	59	59	58
traC/tivB2	65	65	56	56	63	57	60	60	61	60	61	62
traB/topA	65	65	55	55	63	61	62	62	61	58	61	65
traA/slt	67	67	58	58	66	63	64	64	63	62	64	67
Average	63.5833	63.5833	54.0417	53.9583	61.75	59.7917	60.125	60.125	60	59.0833	59.7083	62.6667
*TraI of pXl1 was manually annotated by authors because it was not in the database.
