# Supplementary material for: Novel Self-Transmissible and Broad-Host-Range Plasmids Exogenously Captured From Anaerobic Granules or Cow Manure
Source: Front Microbiol. 2018 Nov 6;9:2602. doi: 10.3389/fmicb.2018.02602 (PMC6232296; doi:10.3389/fmicb.2018.02602)
Supplement: Supplementary file 8 [file Table_8.XLSX]

## Sheet: Table_S8
Table S8. GC contents of genes and its third position of codons in PromAγ and PromAδ plasmids.
pSN1104-11 (PromAγ)				pSN1104-34 (PromAγ)				pSN0729-62 (PromAδ)				pSN0729-70 (PromAδ)
aGene	bLength	GC contents of		aGene	bLength	GC contents of		aGene	bLength	GC contents of		aGene	bLength	GC contents of
		gene	third position			gene	third position			gene	third position			gene	third position
repA	376	66.58	84.84	repA	376	66.58	84.84	repA	421	57.48	63.66	repA	421	57.4	63.42
orf2	158	70.68	87.34	orf2	158	70.68	87.34	orf2	73	51.6	45.21	orf2	84	47.62	45.24
orf3	70	57.14	62.86	orf3	70	57.14	62.86	orf3	82	47.15	43.9
radC	172	59.3	73.84	radC	172	59.3	73.84	radC	172	51.36	58.72	radC	172	51.55	59.3
kleA	104	62.18	74.04	kleA	104	62.18	74.04	kleA	106	57.55	62.26	kleA	106	56.6	58.49
ardC	267	65.29	84.27	ardC	267	65.29	84.27	ardC	268	56.34	64.18	ardC	268	56.84	64.93
orf7	59	62.15	72.88	orf7	59	62.15	72.88	orf7	81	56.79	62.96	orf6	81	56.79	62.96
orf8	130	66.15	83.08	orf8	130	66.15	83.08	orf8	129	60.47	68.99	orf7	129	60.21	68.99
orf9	96	70.83	85.42	orf9	96	70.83	85.42	orf9	345	62.61	67.25	orf8	345	63.57	70.14
kfrA	322	70.91	86.34	kfrA	322	70.91	86.34
orf11	299	69.68	89.97	orf11	327	69.93	90.21	orf10	349	59.31	65.9	orf9	349	58.93	65.33
ssb	117	60.68	85.47	ssb	117	60.68	85.47	ssb	119	54.34	66.39	ssb	119	54.34	66.39
korA	128	62.76	78.91	korA	128	62.76	78.91	korA	128	53.12	60.16	korA	128	52.86	59.38
incC/parA	263	61.85	85.55	incC/parA	263	61.85	85.55	incC/parA	263	52.09	60.08	incC/parA	263	52.22	60.08
korB/parB	383	65.62	81.72	korB/parB	383	65.62	81.72	korB/parB	353	54.67	56.37	korB/parB	359	54.6	56.55
orf16	179	64.8	73.18	orf16	179	64.8	73.18	orf15	145	54.25	55.86	orf14	145	54.94	56.55
orf17	198	61.95	77.78	orf17	198	61.95	77.78	orf16	195	53.68	58.46	orf15	195	52.82	56.92
								orf17	85	56.86	65.88	orf16	280	55	59.29
traS/rlx	360	67.04	86.11	traS/rlx	360	67.04	86.11	traS/rlx	355	56.06	58.59	traS/rlx	355	55.77	56.9
orf19	112	59.82	82.14	orf19	112	59.82	82.14	orf19	158	48.1	53.8	orf18	158	48.1	53.8
orf20	102	61.76	76.47	orf20	102	61.76	76.47
orf21	133	58.65	81.2	orf21	133	58.65	81.2
orf22	78	60.68	66.67	orf22	78	60.68	66.67
traR/mpfL	191	64.22	85.86	traR/mpfL	191	64.22	85.86	traR/mpfL	189	54.5	61.9	traR/mpfL	189	54.32	61.9
traQ	185	66.67	75.14	traQ	185	66.67	75.14	traQ	179	54.75	50.28	traQ	179	54.93	50.84
orf25	120	54.72	81.67	orf25	120	54.72	81.67	orf22	66	50.51	53.03	orf21	66	50.51	53.03
orf26	71	69.48	84.51	orf26	71	69.48	84.51
traO/pri	464	63	79.74	traO/pri	464	63	79.74	traO/pri	628	52.65	54.78	traO/pri	628	53.29	55.89
orf28	238	62.75	83.61	orf28	238	62.75	83.61	orf24	232	51.15	53.88	orf23	232	52.01	56.47
traN/cpl	863	63.5	85.86	traN/cpl	863	63.5	85.86	traN/cpl	837	51.85	54.48	traN/cpl	836	51.67	54.31
traM/tivB11	355	62.72	82.25	traM/tivB11	355	62.72	82.25	traM/tivB11	348	53.93	59.48	traM/tivB11	348	53.93	59.48
traL/tivB10	377	66.49	82.23	traL/tivB10	377	66.49	82.23	traL/tivB10	383	56.14	57.18	traL/tivB10	383	55.87	56.66
traK/tivB9	291	64.03	83.85	traK/tivB9	291	64.03	83.85	traK/tivB9	291	50.63	49.14	traK/tivB9	291	50.63	49.14
traJ/tivB8	242	61.43	81.4	traJ/tivB8	242	61.43	81.4	traJ/tivB8	240	53.06	56.25	traJ/tivB8	240	53.06	56.25
traI/tivB7	53	65.41	67.92	traI/tivB7	53	65.41	67.92	traI/tivB7	144	57.18	61.11	traI/tivB7	144	57.18	59.72
traH/tivB6	360	63.7	88.33	traH/tivB6	360	63.7	88.33	traH/tivB6	357	53.41	61.62	traH/tivB6	357	53.41	61.62
traG/eex	101	64.69	81.19	traG/eex	101	64.69	81.19	traG/eex	79	50.21	51.9	traG/eex	79	49.79	51.9
traF/tivB5	238	61.76	84.45	traF/tivB5	238	61.76	84.45	traF/tivB5	236	54.94	59.75	traF/tivB5	236	54.66	59.32
traE/tivB4	843	60.85	85.53	traE/tivB4	843	60.85	85.53	traE/tivB4	839	50.54	56.97	traE/tivB4	839	50.42	56.73
traD/tivB3	106	59.12	83.02	traD/tivB3	106	59.12	83.02	traD/tivB3	104	54.17	69.23	traD/tivB3	104	54.17	69.23
traC/tivB2	100	65.67	92	traC/tivB2	100	65.67	92	traC/tivB2	103	56.31	72.82	traC/tivB2	103	56.63	72.82
traB/topA	784	64.8	86.86	traB/topA	784	64.8	86.86	traB/topA	770	54.98	61.56	traB/topA	770	55.54	63.25
traA/slt	253	67.72	81.42	traA/slt	253	67.72	81.42	traA/slt	246	57.86	58.54	traA/slt	246	57.86	59.35
orf43	122	55.19	66.39	orf43	122	55.19	66.39	orf39	132	49.75	56.82	orf38	131	50.13	58.02
orf44	141	64.3	79.43	orf44	141	64.3	79.43	orf40	85	56.08	60	orf39	85	56.08	61.18
orf45	66	70.71	87.88	orf45	66	70.71	87.88	orf41	73	62.1	78.08	orf40	73	62.1	78.08
orf46	134	68.91	85.82	orf46	134	68.91	85.82	orf42	137	61.8	76.64	orf41	134	61.94	76.12
orf47	174	70.31	91.95	orf47	174	70.31	91.95	orf43	181	63.54	76.24	orf42	181	63.54	76.24
orf48	73	68.95	93.15	orf48	73	68.95	93.15
orf49	66	68.69	87.88	orf49	66	68.69	87.88
orf50	142	71.36	85.92	orf50	142	71.36	85.92
orf51	44	66.67	86.36	orf51	44	66.67	86.36
orf52	87	68.2	91.95	orf52	87	68.2	91.95	orf44	88	62.12	77.27	orf43	88	62.12	77.27
orf53	90	67.41	87.78	orf53	90	67.41	87.78	orf45	90	57.78	68.89	orf44	90	58.15	70
orf54	70	66.67	88.57	orf54	70	66.67	88.57	orf46	71	53.99	60.56	orf45	71	53.52	60.56
Average		65	82			65	82			55	61			55	61
aConserved genes in these four plasmids are shown in red.
bLength of gene without start and stop codons for the GC content calculationon.
