# Supplementary material for: Novel Self-Transmissible and Broad-Host-Range Plasmids Exogenously Captured From Anaerobic Granules or Cow Manure
Source: Front Microbiol. 2018 Nov 6;9:2602. doi: 10.3389/fmicb.2018.02602 (PMC6232296; doi:10.3389/fmicb.2018.02602)
Supplement: Supplementary file 9 [file Table_9.XLSX]

## Sheet: Table_S9-1
Table S9-1. The number of amino acids in the gene products of PromAγ and Promδ plasmids
	pSN1104-11	pSN1104-34	pSN0729-62	pSN0729-70
amino acids	(54 CDSs)	(54 CDSs)	(46 CDSs)	(45 CDSs)
Phe	394	395	365	368
Leu	921	920	891	907
Ile	477	479	522	536
aMet	246	246	256	255
Val	809	812	728	726
Ser	573	574	588	603
Pro	587	588	514	521
Thr	607	608	586	591
Ala	1510	1516	1216	1239
Tyr	291	292	279	283
His	198	199	187	187
Gln	523	525	533	542
Asn	373	373	411	412
Lys	682	683	648	655
Asp	697	701	681	685
Glu	778	778	803	811
Cys	96	96	89	91
Trp	151	151	140	140
Arg	813	815	728	739
Gly	824	827	790	789
Total	11550	11578	10955	11080
aMet at the start codon is not included.

## Sheet: Table_S9-2
Table S9-2. The number of codons of genes on PromAγ and Promδ plasmids.
First	Second																								third
	U						C						A						G
			pSN1104-11	pSN1104-34	apSN0729-62	apSN0729-70			pSN1104-11	pSN1104-34	apSN0729-62	apSN0729-70			pSN1104-11	pSN1104-34	apSN0729-62	apSN0729-70			pSN1104-11	pSN1104-34	apSN0729-62	apSN0729-70
U	Phe	UUU	41	41	179	180	Ser	UCU	16	16	88	87	Tyr	UAU	66	66	131	134	Cys	UGU	5	5	13	14	U
	Phe	UUC	353	354	186	188	Ser	UCC	106	106	87	91	Tyr	UAC	225	226	148	149	Cys	UGC	91	91	76	77	C
	Leu	UUA	2	2	53	50	Ser	UCA	12	12	89	85	TER	UAA	0	0	0	0	TER	UGA	0	0	0	0	A
	Leu	UUG	110	109	170	174	Ser	UCG	214	214	102	109	TER	UAG	0	0	0	0	Trp	UGG	151	151	140	140	G
C	Leu	CUU	84	84	194	196	Pro	CCU	50	50	104	104	His	CAU	52	52	70	73	Arg	CGU	65	65	103	105	U
	Leu	CUC	176	176	59	59	Pro	CCC	146	146	103	105	His	CAC	146	147	117	114	Arg	CGC	526	527	287	284	C
	Leu	CUA	24	24	51	55	Pro	CCA	29	30	108	111	Gln	CAA	140	140	218	222	Arg	CGA	46	46	78	75	A
	Leu	CUG	525	525	364	373	Pro	CCG	362	362	199	201	Gln	CAG	383	385	315	320	Arg	CGG	139	139	162	171	G
A	Ile	AUU	96	96	242	242	Thr	ACU	32	32	96	97	Asn	AAU	48	48	126	121	Ser	AGU	21	21	45	44	U
	Ile	AUC	373	375	228	231	Thr	ACC	240	241	213	221	Asn	AAC	325	325	285	291	Ser	AGC	204	205	177	187	C
	Ile	AUA	8	8	52	63	Thr	ACA	23	23	123	120	Lys	AAA	99	99	305	311	Arg	AGA	6	6	42	43	A
	Met	AUG	246	246	256	255	Thr	ACG	312	312	154	153	Lys	AAG	583	584	343	344	Arg	AGG	31	32	56	61	G
G	Val	GUU	94	94	264	248	Ala	GGU	110	110	203	197	Asp	GAU	177	177	284	287	Gly	GGU	59	59	170	175	U
	Val	GUC	282	282	136	142	Ala	GCC	765	769	461	475	Asp	GAC	520	524	397	398	Gly	GGC	646	648	406	401	C
	Val	GUA	35	35	109	110	Ala	GCA	123	123	268	279	Glu	GAA	304	304	533	534	Gly	GGA	37	38	76	80	A
	Val	GUG	398	401	219	226	Ala	GCG	512	514	284	288	Glu	GAG	474	474	270	277	Gly	GGG	82	82	138	133	G
aThe larger and smaller number of codons in PromAδ plasmids than that of PromAγ plasmids are shown in red and blue, respectively.
